# Supplementary material
Source: HighWire-hosted journal article supplement (https://adc.bmj.com/content/archdischild-2019-317590)
Supplement: inline-supplementary-material-2 [file inline-supplementary-material-2.pdf]

| sample | mean fluorescent units (from technical triplicates) |          |          | fluorescent units - ART fluoresce |          |
|--------|-----------------------------------------------------|----------|----------|-----------------------------------|----------|
|        | 1st rep                                             | 2nd rep  | mean     | 1st rep                           | 2nd rep  |
| 1      | 32251.33                                            | 34160.67 | 33206.00 | 26689.13                          | 28598.46 |
| 2      | 20194.00                                            | 24437.67 | 22315.83 | 14631.79                          | 18875.46 |
| 3      | 4844.33                                             | 4780.67  | 4812.50  | -717.88                           | -781.54  |
| 4      | 15268.33                                            | 16991.33 | 16129.83 | 9706.13                           | 11429.13 |
| 5      | 43573.67                                            | 35622.67 | 39598.17 | 38011.46                          | 30060.46 |
| 6      | 18820.33                                            | 16518.00 | 17669.17 | 13258.13                          | 10955.79 |
| 7      | 28098.33                                            | 31911.33 | 30004.83 | 22536.13                          | 26349.13 |
| 8      | 25711.33                                            | 25422.67 | 25567.00 | 20149.13                          | 19860.46 |
| 9      | 34366.33                                            | 20921.00 | 27643.67 | 28804.13                          | 15358.79 |
| 10     | 35261.67                                            | 40007.33 | 37634.50 | 29699.46                          | 34445.13 |
| 11     | 35003.67                                            | 36304.67 | 35654.17 | 29441.46                          | 30742.46 |
| 12     | 24956.00                                            | 23097.67 | 24026.83 | 19393.79                          | 17535.46 |
| 13     | 20199.00                                            | 18573.33 | 19386.17 | 14636.79                          | 13011.13 |
| 14     | 26031.67                                            | 22467.67 | 24249.67 | 20469.46                          | 16905.46 |
| 15     | 19636.67                                            | 16714.00 | 18175.33 | 14074.46                          | 11151.79 |
| 16     | 28712.67                                            | 20362.33 | 24537.50 | 23150.46                          | 14800.13 |
| 17     | 27435.00                                            | 21819.00 | 24627.00 | 21872.79                          | 16256.79 |
| 18     | 19329.33                                            | 18000.67 | 18665.00 | 13767.13                          | 12438.46 |
| 19     | 20857.00                                            | 20476.33 | 20666.67 | 15294.79                          | 14914.13 |
| 20     | 39894.67                                            | 40145.67 | 40020.17 | 34332.46                          | 34583.46 |
| 21     | 29137.33                                            | 34801.00 | 31969.17 | 23575.13                          | 29238.79 |
| 22     | 28671.67                                            | 32421.67 | 30546.67 | 23109.46                          | 26859.46 |
| 23     | 29695.67                                            | 29691.67 | 29693.67 | 24133.46                          | 24129.46 |
| 24     | 32864.67                                            | 34322.00 | 33593.33 | 27302.46                          | 28759.79 |
| 25     | 28016.67                                            | 30537.67 | 29277.17 | 22454.46                          | 24975.46 |
| 26     | 13388.33                                            | 7044.33  | 10216.33 | 7826.13                           | 1482.13  |
| 27     | 30514.67                                            | 32993.67 | 31754.17 | 24952.46                          | 27431.46 |
| 28     | 29360.00                                            | 34209.33 | 31784.67 | 23797.79                          | 28647.13 |
| 29     | 27150.33                                            | 29406.00 | 28278.17 | 21588.13                          | 23843.79 |
| 30     | 22663.33                                            | 25122.67 | 23893.00 | 17101.13                          | 19560.46 |
| 31     | 19448.33                                            | 15801.00 | 17624.67 | 13886.13                          | 10238.79 |
| 32     | 39402.67                                            | 39828.33 | 39615.50 | 33840.46                          | 34266.13 |
| 33     | 31758.33                                            | 32038.00 | 31898.17 | 26196.13                          | 26475.79 |
| 34     | 31951.00                                            | 33472.00 | 32711.50 | 26388.79                          | 27909.79 |
| 35     | 15254.33                                            | 10265.67 | 12760.00 | 9692.13                           | 4703.46  |
| 36     | 20248.00                                            | 20362.00 | 20305.00 | 14685.79                          | 14799.79 |
| 37     | 39531.33                                            | 38915.33 | 39223.33 | 33969.13                          | 33353.13 |
| 38     | 33447.00                                            | 29702.67 | 31574.83 | 27884.79                          | 24140.46 |
| 39     | 30540.00                                            | 27620.00 | 29080.00 | 24977.79                          | 22057.79 |
| 40     | 40376.67                                            | 34865.00 | 37620.83 | 34814.46                          | 29302.79 |
| 41     | 34887.33                                            | 27205.00 | 31046.17 | 29325.13                          | 21642.79 |
| 42     | 31580.00                                            | 29229.67 | 30404.83 | 26017.79                          | 23667.46 |
| 43     | 15516.67                                            | 25139.33 | 20328.00 | 9954.46                           | 19577.13 |
| 44     | 15758.00                                            | 4695.00  | 10226.50 | 10195.79                          | -867.21  |
| 45     | 24941.00                                            | 16391.67 | 20666.33 | 19378.79                          | 10829.46 |
| 46     | 42189.67                                            | 38435.67 | 40312.67 | 36627.46                          | 32873.46 |
| 47     | 23877.00                                            | 26040.33 | 24958.67 | 18314.79                          | 20478.13 |
| 48     | 9725.67                                             | 6259.67  | 7992.67  | 4163.46                           | 697.46   |

|           |          |          |          |          |          |
|-----------|----------|----------|----------|----------|----------|
| <b>49</b> | 25448.67 | 22903.33 | 24176.00 | 19886.46 | 17341.13 |
| <b>50</b> | 31189.67 | 31345.33 | 31267.50 | 25627.46 | 25783.13 |
| <b>51</b> | 27567.33 | 25697.33 | 26632.33 | 22005.13 | 20135.13 |
| <b>52</b> | 27189.33 | 18318.33 | 22753.83 | 21627.13 | 12756.13 |
| <b>53</b> | 30304.67 | 29085.33 | 29695.00 | 24742.46 | 23523.13 |
| <b>54</b> | 30776.33 | 27553.00 | 29164.67 | 25214.13 | 21990.79 |
| <b>55</b> | 39802.33 | 39083.67 | 39443.00 | 34240.13 | 33521.46 |
| <b>56</b> | 29346.33 | 30191.00 | 29768.67 | 23784.13 | 24628.79 |

| ent units (M14) | percentage of growth respective to H2O |         |       |
|-----------------|----------------------------------------|---------|-------|
|                 | 1st rep                                | 2nd rep | mean  |
| 27643.79        | 1.37                                   | 1.47    | 1.42  |
| 16753.63        | 0.75                                   | 0.97    | 0.86  |
| -749.71         | -0.04                                  | -0.04   | -0.04 |
| 10567.63        | 0.50                                   | 0.59    | 0.54  |
| 34035.96        | 1.96                                   | 1.55    | 1.75  |
| 12106.96        | 0.68                                   | 0.56    | 0.62  |
| 24442.63        | 1.16                                   | 1.36    | 1.26  |
| 20004.79        | 1.04                                   | 1.02    | 1.03  |
| 22081.46        | 1.48                                   | 0.79    | 1.14  |
| 32072.29        | 1.53                                   | 1.77    | 1.65  |
| 30091.96        | 1.52                                   | 1.58    | 1.55  |
| 18464.63        | 1.00                                   | 0.90    | 0.95  |
| 13823.96        | 0.75                                   | 0.67    | 0.71  |
| 18687.46        | 1.05                                   | 0.87    | 0.96  |
| 12613.13        | 0.72                                   | 0.57    | 0.65  |
| 18975.29        | 1.19                                   | 0.76    | 0.98  |
| 19064.79        | 1.13                                   | 0.84    | 0.98  |
| 13102.79        | 0.71                                   | 0.64    | 0.67  |
| 15104.46        | 0.79                                   | 0.77    | 0.78  |
| 34457.96        | 1.77                                   | 1.78    | 1.77  |
| 26406.96        | 1.21                                   | 1.51    | 1.36  |
| 24984.46        | 1.19                                   | 1.38    | 1.29  |
| 24131.46        | 1.24                                   | 1.24    | 1.24  |
| 28031.13        | 1.41                                   | 1.48    | 1.44  |
| 23714.96        | 1.16                                   | 1.29    | 1.22  |
| 4654.13         | 0.40                                   | 0.08    | 0.24  |
| 26191.96        | 1.29                                   | 1.41    | 1.35  |
| 26222.46        | 1.23                                   | 1.48    | 1.35  |
| 22715.96        | 1.11                                   | 1.23    | 1.17  |
| 18330.79        | 0.88                                   | 1.01    | 0.94  |
| 12062.46        | 0.72                                   | 0.53    | 0.62  |
| 34053.29        | 1.74                                   | 1.76    | 1.75  |
| 26335.96        | 1.35                                   | 1.36    | 1.36  |
| 27149.29        | 1.36                                   | 1.44    | 1.40  |
| 7197.79         | 0.50                                   | 0.24    | 0.37  |
| 14742.79        | 0.76                                   | 0.76    | 0.76  |
| 33661.13        | 1.75                                   | 1.72    | 1.73  |
| 26012.63        | 1.44                                   | 1.24    | 1.34  |
| 23517.79        | 1.29                                   | 1.14    | 1.21  |
| 32058.63        | 1.79                                   | 1.51    | 1.65  |
| 25483.96        | 1.51                                   | 1.11    | 1.31  |
| 24842.63        | 1.34                                   | 1.22    | 1.28  |
| 14765.79        | 0.51                                   | 1.01    | 0.76  |
| 4664.29         | 0.53                                   | -0.04   | 0.24  |
| 15104.13        | 1.00                                   | 0.56    | 0.78  |
| 34750.46        | 1.89                                   | 1.69    | 1.79  |
| 19396.46        | 0.94                                   | 1.05    | 1.00  |
| 2430.46         | 0.21                                   | 0.04    | 0.13  |

|          |      |      |      |
|----------|------|------|------|
| 18613.79 | 1.02 | 0.89 | 0.96 |
| 25705.29 | 1.32 | 1.33 | 1.32 |
| 21070.13 | 1.13 | 1.04 | 1.09 |
| 17191.63 | 1.11 | 0.66 | 0.89 |
| 24132.79 | 1.27 | 1.21 | 1.24 |
| 23602.46 | 1.30 | 1.13 | 1.22 |
| 33880.79 | 1.76 | 1.73 | 1.75 |
| 24206.46 | 1.23 | 1.27 | 1.25 |

**four 96-well plates run in total with two biological replicates, controls included on each plate**

| mean fluorescent units of controls (from technical triplicates) |                                              |         |
|-----------------------------------------------------------------|----------------------------------------------|---------|
| sample                                                          | 1st rep                                      | 2nd rep |
| plate_1 ART                                                     | 7089                                         | 4345    |
| plate_1 H2O                                                     | 23203                                        | 22309   |
| plate_2 ART                                                     | 6537                                         | 4575    |
| plate_2 H2O                                                     | 24314                                        | 29289   |
| plate_3 ART                                                     | 7583                                         | 3992    |
| plate_3 H2O                                                     | 29164                                        | 27035   |
| plate_4 ART                                                     | 6447                                         | 3931    |
| plate_4 H2O                                                     | 19524                                        | NA      |
| <b>sample</b>                                                   | <b>mean of all plates and all replicates</b> |         |
| <b>ART</b>                                                      | <b>5562</b>                                  |         |
| <b>H2O</b>                                                      | <b>24977</b>                                 |         |
| <hr/>                                                           |                                              |         |
| H2O-ART (=100%)                                                 | 19415                                        |         |
